# Supplementary material for: Identification of Long Noncoding RNAs in Distinct Subtypes of Mouse Retinal Ganglion Cells&nbsp;
Source: Research Square preprint supplement (doi:10.21203/rs.3.rs-147625/v1), 2021-01-25
Supplement: Supplementary file 1 [file 5ac91168c4a5ded609733d23.xlsx]

## Sheet: Injured ooDSGC vs normal ooDSGC
Top Ten Enriched GO Terms (P-Value < 0.05)	Count	P-Value	mRNA
Cluster 1
GO:0006096~glycolytic process	9	1.03576e-09	GPI1, PFKL, TPI1, PKM, PGAM1, PGK1, ALDOC, ENO1, ALDOA
GO:0005509~calcium ion binding	21	7.07197e-06	TPD52, SYT2, KCNIP1, PCDH10, PCDH8, PCDH11X, KCNIP4, HPCAL1, ITPR1, ATP2B2, CABP1, RASGRP2, SULF2, GRIN1, CDH6, NELL2, CALB2, VSNL1, PLCB1, PLCD4, PCDHB9
GO:1901379~regulation of potassium ion transmembrane transport	5	8.64147e-06	DPP6, KCNIP1, KCNC1, KCNIP4, KCNAB2
GO:0005216~ion channel activity	10	2.87526e-05	CHRNB3, KCNC1, SCN8A, KCNA1, KCNC3, CHRNA6, KCNA2, ITPR1, SCN1A, GRIN1
GO:0005244~voltage-gated ion channel activity	9	3.44202e-05	KCNIP1, KCNC1, SCN8A, KCNA1, KCNC3, KCNA2, KCNIP4, KCNAB2, SCN1A
GO:0034765~regulation of ion transmembrane transport	9	3.51367e-05	KCNIP1, KCNC1, SCN8A, KCNA1, KCNC3, KCNA2, KCNIP4, KCNAB2, SCN1A
GO:0050905~neuromuscular process	5	8.74718e-05	SCN8A, KCNA1, KCNAB2, FGF12, GRIN1
GO:0007399~nervous system development	13	0.00019359	ROBO2, NRN1, EPHA8, MAGI2, SIGMAR1, CPLX2, POU4F1, HDAC9, TTLL7, DLG2, CHN1, CNTN4, BEND6
GO:0005515~protein binding	59	0.000209458	SNAP25, RAB7, RAB3A, KCNC1, PCDH11X, CPNE6, RGS2, SIX6, DPYSL4, ADORA1, SH3BGRL2, NEFL, SH3GL2, IER3, TPD52, LYNX1, RBFOX3, EPHA8, APLP2, MAGI2, ADAM11, HPCAL1, KCNAB2, SHTN1, PKM, SCN8A, ELMO1, MGARP, PLCB1, CHRNA6, KCNA2, ITPR1, CEND1, CABP1, HDAC9, RHOBTB2, DPP6, PORCN, KLC2, INPP5F, ADAM23, APBB2, PIP5K1C, SRGAP1, PACSIN1, RUNX1T1, SYT2, CADM2, LGI3, LIMK1, PARVA, POU4F1, GRIN1, PNKD, RIT2, D…
GO:0033693~neurofilament bundle assembly	3	0.00024981	NEFL, NEFM, NEFH
Cluster 2
GO:0004812~aminoacyl-tRNA ligase activity	10	4.53003e-12	CARS, YARS, NARS, LARS, RARS, TARS, SARS, GARS, EPRS, AARS
GO:0006418~tRNA aminoacylation for protein translation	9	1.07008e-10	CARS, YARS, NARS, LARS, RARS, TARS, SARS, GARS, EPRS
GO:0006412~translation	15	7.28344e-07	CARS, YARS, SARS, TARS, EIF2S2, EPRS, NARS, EIF5, RPS15A, LARS, RARS, SLC25A51, GARS, EIF3C, AARS
GO:0016874~ligase activity	12	4.06707e-05	CARS, YARS, NARS, LARS, RARS, TARS, SARS, ASNS, GARS, EPRS, RNF185, AARS
GO:0070059~intrinsic apoptotic signaling pathway in response to endoplasmic reticulum stress	5	0.00010802	CEBPB, DDIT3, TRIB3, CHAC1, ATF4
GO:0034976~response to endoplasmic reticulum stress	6	0.000181811	CREB3, CEBPB, DDIT3, TRIB3, HERPUD1, ATF4
GO:0006865~amino acid transport	5	0.00019879	SLC7A5, SLC6A9, SLC3A2, SLC7A1, SLC7A3
GO:0044822~poly(A) RNA binding	20	0.000207388	YARS, HSPA9, CAST, MRPS26, HSP90AA1, TES, STRBP, GOT2, SLC3A2, GPATCH4, DDX52, EIF2S2, HNRNPAB, TBRG4, DUSP14, RALYL, EIF5, RPS15A, LGALS1, EIF3C
GO:0005524~ATP binding	24	0.000218166	CARS, YARS, HSPA9, HSP90AA1, SRXN1, SARS, ASNS, TARS, DDX52, EPRS, NARS, PSMC6, CDC34, LARS, MKNK1, RARS, ATP6V1B2, LONP1, TRIB3, GARS, TNIK, STK40, CDK15, AARS
GO:0006564~L-serine biosynthetic process	3	0.000281882	SHMT2, PSAT1, PSPH
Cluster 3
GO:0008432~JUN kinase binding	2	0.0162755	GSTP1, KIF5B
GO:0005515~protein binding	11	0.0191237	ACTR3, RAP1B, EEF1A1, HCN3, PRMT2, CDHR1, SDC2, KIF5B, MRFAP1, H2-D1, ZWINT
GO:0004602~glutathione peroxidase activity	2	0.0249342	GPX3, GSTP1
GO:0051491~positive regulation of filopodium assembly	2	0.04037	ACTR3, GPM6A
GO:0071364~cellular response to epidermal growth factor stimulus	2	0.0467332	EEF1A1, GSTP1
Cluster 4
GO:0032403~protein complex binding	6	0.000196922	NFKBIA, RPH3A, CALY, PRKACA, NPTXR, SPTBN1
GO:0031175~neuron projection development	3	0.0207984	LINGO1, NPTXR, CDK5R1
GO:0071158~positive regulation of cell cycle arrest	2	0.0378133	PRKACA, CDK5R1

## Sheet: Injured ooDSGC vs Injured ipRGC
Top Ten Enriched GO Terms (P-Value < 0.05)	Count	P-Value	mRNA
Cluster 1
GO:0004812~aminoacyl-tRNA ligase activity	10	2.52557e-11	CARS, YARS, NARS, LARS, RARS, TARS, SARS, GARS, IARS, AARS
GO:0006418~tRNA aminoacylation for protein translation	9	4.37999e-10	CARS, YARS, NARS, LARS, RARS, TARS, SARS, GARS, IARS
GO:0006412~translation	15	5.96655e-06	CARS, YARS, SARS, TARS, EIF2S2, NARS, LARS, RARS, SLC25A51, GARS, IARS, EIF3C, SLC25A5, SLC25A33, AARS
GO:0016874~ligase activity	13	5.05295e-05	CARS, YARS, SARS, ASNS, TARS, NARS, LARS, RARS, UBA3, GARS, IARS, RNF185, AARS
GO:0005524~ATP binding	28	0.000107778	CARS, DDX24, TARS, OPLAH, STK3, UBE2L3, NARS, ATP5B, LARS, MKNK1, RARS, LONP1, PGK1, YARS, HSPA9, HSP90AA1, SARS, ASNS, PSMC6, CDC34, PKM, PSMC4, UBA3, ATP6V1B2, GARS, IARS, STK40, AARS
GO:0006096~glycolytic process	5	0.000212463	TPI1, PKM, PGK1, ENO1, ENO2
GO:0000166~nucleotide binding	32	0.000240582	CARS, DDX24, AGAP1, TARS, OPLAH, STK3, UBE2L3, RASD2, NARS, ATP5B, LARS, MKNK1, RARS, LONP1, RAB6B, YARS, HSPA9, HSP90AA1, SARS, ASNS, HNRNPAB, RALYL, PSMC6, CDC34, PKM, PSMC4, UBA3, GARS, IARS, STK40, AARS, HCN1
GO:0030163~protein catabolic process	5	0.000599724	CAST, PSMC6, PSMC4, LONP1, WDYHV1
GO:0006532~aspartate biosynthetic process	3	0.000663594	GOT1, GOT2, BCAT1
GO:0006986~response to unfolded protein	5	0.000819108	CREB3, HSP90AA1, DDIT3, CHAC1, HERPUD1
Cluster 2
GO:0032403~protein complex binding	15	5.59773e-07	PCSK2, LRP1, STX7, CIB2, ARRB2, PTPRF, PPP1CA, NFKBIA, RPH3A, CALY, GNA11, GNAQ, DLGAP1, PRKACA, NPTXR
GO:0005515~protein binding	53	3.03941e-05	ARF4, SYNM, ATP8A1, CD81, MRFAP1, NR2E3, RPH3A, KIF1B, PRKACA, JAK2, GPRASP1, TLE4, PRMT2, APLP1, STX7, ADAM10, IMPACT, RCN2, OLFM3, HAP1, MICU2, GRIA1, HCN3, RTN3, LRP1, SDC2, IL4RA, FOXO3, HSP90B1, MAP2, EPB41L2, CTNNA1, NDN, TRP53BP1, LDLR, MAPK3, PAIP
GO:0031826~type 2A serotonin receptor binding	3	0.000169604	GNA11, GNAQ, ARRB2
GO:0005509~calcium ion binding	15	0.000839682	SYT5, C2CD5, LRP1, CLSTN2, GUCA1A, CIB2, ATP2C1, RPH3A, RCN2, SPOCK1, MICU2, AGRN, LDLR, SNCA, CDK5R1
GO:0045944~positive regulation of transcription from RNA polymerase II promoter	18	0.00119465	ARF4, PEG3, CD81, PSIP1, NUCKS1, IGF1, FOXO3, BMP7, NR2E3, NFKBIA, ZEB2, ERCC2, NDN, TRP53BP1, JAK2, AGRN, TAF2, MAPK3
GO:0007568~aging	7	0.00191058	LRP1, ERCC2, CTNNA1, TIMP2, HMGCR, FOXO3, SNCA
GO:0006417~regulation of translation	6	0.00214326	IMPACT, APLP1, IGF1, FOXO3, PPP1CA, PAIP1
GO:0031623~receptor internalization	4	0.00328601	GRIA1, CD81, ARRB2, SNCA
GO:0006810~transport	25	0.00415468	GRIA1, PLEKHF2, HCN3, ARF4, RTN3, C2CD5, ATP8A1, KCNA3, ARRB2, ATP2C1, RPH3A, RIMS3, G3BP2, SLC17A7, SLC38A3, LDLR, KCNH1, CACNA2D2, TMCO3, IGF2R, ANO3, CLCN5, HNRNPA2B1, FXYD6, HAP1
GO:0006906~vesicle fusion	4	0.00583617	RPH3A, SYT5, C2CD5, STX7

## Sheet: Normal ooDSGC vs normal ipRGC
Top Ten Enriched GO Terms (P-Value < 0.05)	Count	P-Value	mRNA
Cluster 1
GO:0006096~glycolytic process	9	1.57e-09	GPI1, PFKL, TPI1, PKM, PGAM1, PGK1, ALDOC, ENO1, ALDOA
GO:0005509~calcium ion binding	22	5.04e-06	TPD52, SYT2, KCNIP1, PCDH10, PCDH8, PCDH11X, KCNIP4, HPCAL1, ATP2B2, CABP1, RASGRP2, FSTL4, SULF2, NELL2, CDH6, CALB2, ATP5B, VSNL1, PLS3, PLCB1, PLCD4, PCDHB9
GO:0034765~regulation of ion transmembrane transport	10	6.67e-06	KCNIP1, KCNC1, SCN8A, KCNA1, KCNC3, KCNA2, KCNIP4, KCNAB2, SCN1B, SCN1A
GO:0005244~voltage-gated ion channel activity	10	6.92e-06	KCNIP1, KCNC1, SCN8A, KCNA1, KCNC3, KCNA2, KCNIP4, KCNAB2, SCN1B, SCN1A
GO:1901379~regulation of potassium ion transmembrane transport	5	1.06e-05	DPP6, KCNIP1, KCNC1, KCNIP4, KCNAB2
GO:0006811~ion transport	17	0.000181	CHRNB3, KCNIP1, KCNC1, KCNA1, KCNC3, KCNA2, KCNIP4, CHRNA6, ATP2B2, KCNAB2, ATP5B, SCN8A, CACHD1, SLC17A6, SCN1B, SLC39A3, SCN1A
GO:0033693~neurofilament bundle assembly	3	0.000278	NEFL, NEFM, NEFH
GO:0019228~neuronal action potential	5	0.000313	DPP6, SCN8A, KCNA1, KCNA2, SCN1A
GO:0007399~nervous system development	13	0.000315	ROBO2, NRN1, EPHA8, MAGI2, CPLX2, POU4F1, HDAC9, TTLL7, DLG2, TRNP1, CHN1, CNTN4, BEND6
GO:0005249~voltage-gated potassium channel activity	6	0.000617	SNAP25, KCNC1, KCNA1, KCNC3, KCNA2, KCNAB2
Cluster 2
GO:0005515~protein binding	39	0.000771318	GRIA1, HCN3, ARF4, NRP2, SYNM, CD81, SDC2, MRFAP1, MLLT3, RAP1B, KIF5B, EPB41L2, CTNNA1, NDN, BBS9, PCBD1, MAPK3, TLE4, ACTR3, CHRNB2, MAP2K4, RBM39, GPX1, RPL21, PRMT2, STX7, ADAM10, IGF1, BMP7, ZWINT, EEF1A1, DLG1, OLFM3, GNAQ, CDHR1, UBA2, MICU2, AIDA,
GO:0009636~response to toxic substance	5	0.00181529	GRIA1, ARNT2, GPX1, SLC6A1, MAPK3
GO:0007399~nervous system development	9	0.00202176	SEMA5A, PCSK2, GPM6A, NRP2, SDC2, NDNF, IGF1, PTPRF, ITM2C
GO:0005509~calcium ion binding	12	0.00219258	DGKG, SYT5, C2CD5, TENM2, GNPTAB, MMP15, SPOCK2, CDHR1, SPOCK1, CIB2, MICU2, SNCA
GO:0043407~negative regulation of MAP kinase activity	4	0.00220668	UCHL1, HMGCR, BMP7, PTPN5
GO:0001764~neuron migration	5	0.00673792	GPM6A, NRP2, NDN, SPOCK1, NDNF
GO:0019233~sensory perception of pain	4	0.0112846	CHRNB2, UCHL1, NDN, MAPK3
GO:0019948~SUMO activating enzyme activity	2	0.0114314	UBA2, SAE1
GO:0016126~sterol biosynthetic process	3	0.0114552	HMGCS1, MSMO1, HMGCR
GO:0007411~axon guidance	5	0.0126388	SEMA5A, NRP2, TENM2, KIF5B, BMP7
